# Supplementary material for: Detection rate of IGF-1 variants and their implication to protein binding: study of over 240,000 patients
Source: publisher site journal article supplement (doi:10.1515/cclm-2023-0709), 2023-10-09
Supplement: Supplementary file 1 [file j_cclm-2023-0709_suppl_001.xlsx]

## Sheet: Z score x2
Z score	Age	Sex	Conc x2	Conc	Z-score x2	Diagnosis		Miss	%
-5.4	18	M	36	18	-4.29441	good	good	280	0.257827
-4.8	18	M	54	27	-3.60252	good	good
-4.6	15	M	68	34	-3.84367	good	good
-4.3	15	M	94	47	-3.38531	good	good
-4.3	13	F	66	33	-3.6327	good	good
-4.3	20	M	54	27	-3.18084	good	good
-4.3	17	F	110	55	-3.23087	good	good
-4.2	15	F	114	57	-3.26347	good	good
-4.2	14	F	100	50	-3.32408	good	good
-4.1	20	F	62	31	-2.93199	good	good
-4.1	14	M	86	43	-3.28043	good	good
-4	12	M	44	22	-3.48955	good	good
-4	21	M	60	30	-2.81153	good	good
-3.7	47	F	34	17	-2.68516	good	good
-3.7	17	M	184	92	-2.29491	good	good
-3.7	24	M	56	28	-2.50287	good	good
-3.7	17	F	162	81	-2.44862	good	good
-3.6	12	M	80	40	-2.79799	good	good
-3.6	16	F	186	93	-2.30798	good	good
-3.5	13	M	116	58	-2.53236	good	good
-3.5	13	F	150	75	-2.42634	good	good
-3.5	17	M	208	104	-1.9749	miss	good
-3.5	14	F	180	90	-2.27644	good	good
-3.5	16	F	196	98	-2.18446	good	good
-3.4	16	F	214	107	-1.96829	miss	good
-3.4	14	M	154	77	-2.27092	good	good
-3.4	47	F	44	22	-2.25665	good	good
-3.4	67	F	32	16	-2.32025	good	good
-3.3	16	M	224	112	-1.73824	miss	good
-3.3	11	F	102	51	-2.45464	good	good
-3.3	13	M	142	71	-2.16317	good	good
-3.3	15	F	218	109	-1.94984	miss	good
-3.3	12	M	102	51	-2.43794	good	good
-3.2	20	F	106	53	-1.89809	miss	good
-3.2	17	M	244	122	-1.52135	miss	good
-3.2	12	M	118	59	-2.19542	good	good
-3.2	49	F	48	24	-2.10022	good	good
-3.2	40	F	50	25	-2.03155	good	good
-3.2	15	M	206	103	-1.82464	miss	good
-3.2	13	F	190	95	-1.95372	miss	good
-3.2	14	M	176	88	-1.98547	miss	good
-3.2	16	M	238	119	-1.57111	miss	good
-3.2	16	F	246	123	-1.60118	miss	good
-3.1	15	M	228	114	-1.56372	miss	good
-3.1	14	F	238	119	-1.63329	miss	good
-3.1	11	F	128	64	-2.09695	good	good
-3.1	11	M	92	46	-2.26819	good	good
-3.1	19	F	128	64	-1.70752	miss	good
-3.1	15	M	218	109	-1.68101	miss	good
-3.1	14	M	200	100	-1.68991	miss	good
-3.1	11	M	92	46	-2.26819	good	good
-3.1	15	M	228	114	-1.56372	miss	good
-3.1	11	M	90	45	-2.3013	good	good
-3.1	24	F	78	39	-1.88982	miss	good
-3	12	M	140	70	-1.8825	miss	good
-3	16	F	272	136	-1.3168	miss	good
-3	17	F	246	123	-1.37356	miss	good
-3	12	M	136	68	-1.93784	miss	good
-3	18	F	148	74	-1.61803	miss	good
-3	17	F	252	126	-1.30294	miss	good
-3	15	M	236	118	-1.47136	miss	good
-3	68	F	40	20	-1.9169	miss	good
-3	13	M	168	84	-1.82023	miss	good
-3	14	M	210	105	-1.571	miss	good
-3	17	F	244	122	-1.39726	miss	good
-3	38	F	56	28	-1.83564	miss	good
-2.9	26	F	78	39	-1.67868	miss	good
-2.9	16	M	276	138	-1.13623	miss	good
-2.9	14	M	216	108	-1.50073	miss	good
-2.9	16	M	268	134	-1.22569	miss	good
-2.9	55	M	56	28	-1.75597	miss	good
-2.9	80	F	36	18	-1.87391	miss	good
-2.9	85	M	38	19	-2.0223	good	good
-2.9	12	M	150	75	-1.74683	miss	good
-2.9	12	M	144	72	-1.82778	miss	good
-2.9	13	M	182	91	-1.64441	miss	good
-2.9	11	M	112	56	-1.95158	miss	good
-2.8	11	M	124	62	-1.77248	miss	good
-2.8	16	M	288	144	-1.00397	miss	good
-2.8	11	F	158	79	-1.71876	miss	good
-2.8	52	F	64	32	-1.561	miss	good
-2.8	11	M	126	63	-1.74332	miss	good
-2.8	17	M	302	151	-0.843506	miss	good
-2.8	46	F	64	32	-1.59419	miss	good
-2.8	53	F	60	30	-1.66566	miss	good
-2.8	77	F	40	20	-1.68078	miss	good
-2.8	51	F	62	31	-1.62991	miss	good
-2.8	21	F	118	59	-1.49755	miss	good
-2.8	15	M	258	129	-1.22362	miss	good
-2.8	13	M	200	100	-1.42611	miss	good
-2.8	13	M	202	101	-1.40235	miss	good
-2.8	22	F	110	55	-1.48095	miss	good
-2.8	16	F	304	152	-0.981321	miss	good
-2.8	12	M	156	78	-1.66717	miss	good
-2.7	13	F	254	127	-1.27364	miss	good
-2.7	57	F	64	32	-1.46955	miss	good
-2.7	16	M	304	152	-0.831004	miss	good
-2.7	14	M	252	126	-1.09449	miss	good
-2.7	57	F	62	31	-1.52771	miss	good
-2.7	76	M	42	21	-1.60751	miss	good
-2.7	12	F	212	106	-1.43541	miss	good
-2.7	11	M	140	70	-1.54414	miss	good
-2.7	63	M	54	27	-1.58961	miss	good
-2.7	12	M	168	84	-1.51143	miss	good
-2.7	8	F	64	32	-2.00923	good	good
-2.7	10	F	128	64	-1.73784	miss	good
-2.7	14	F	296	148	-1.05057	miss	good
-2.7	58	F	60	30	-1.56154	miss	good
-2.6	16	M	318	159	-0.682623	miss	good
-2.6	14	M	260	130	-1.00745	miss	good
-2.6	35	F	74	37	-1.35102	miss	good
-2.6	17	F	306	153	-0.695101	miss	good
-2.6	18	F	188	94	-1.08544	miss	good
-2.6	55	F	68	34	-1.4017	miss	good
-2.6	46	F	70	35	-1.428	miss	good
-2.6	17	F	300	150	-0.76039	miss	good
-2.6	45	M	72	36	-1.37498	miss	good
-2.6	10	M	112	56	-1.59827	miss	good
-2.6	12	F	230	115	-1.24556	miss	good
-2.6	9	M	84	42	-1.70852	miss	good
-2.6	72	F	48	24	-1.46699	miss	good
-2.6	67	F	54	27	-1.43767	miss	good
-2.6	13	M	222	111	-1.16971	miss	good
-2.6	33	F	76	38	-1.34153	miss	good
-2.5	66	F	60	30	-1.28708	miss	good
-2.5	74	M	48	24	-1.41384	miss	good
-2.5	14	F	328	164	-0.748745	miss	good
-2.5	46	F	74	37	-1.32344	miss	good
-2.5	72	M	52	26	-1.32699	miss	good
-2.5	13	M	234	117	-1.03415	miss	good
-2.5	11	M	152	76	-1.37968	miss	good
-2.5	53	F	72	36	-1.32876	miss	good
-2.5	56	F	72	36	-1.2739	miss	good
-2.5	12	M	194	97	-1.18853	miss	good
-2.5	12	M	190	95	-1.23703	miss	good
-2.5	11	M	154	77	-1.35279	miss	good
-2.5	10	M	120	60	-1.47513	miss	good
-2.5	11	M	152	76	-1.37968	miss	good
-2.5	14	M	274	137	-0.857666	miss	good
-2.5	12	M	196	98	-1.16443	miss	good
-2.4	49	M	148	74	0.0910757	miss	good
-2.4	11	M	170	85	-1.14243	miss	good
-2.4	43	F	80	40	-1.17217	miss	good
-2.4	12	M	212	106	-0.975072	miss	good
-2.4	14	F	334	167	-0.693488	miss	good
-2.4	32	M	88	44	-1.08804	miss	good
-2.4	10	M	134	67	-1.26727	miss	good
-2.4	54	M	76	38	-1.21075	miss	good
-2.4	11	F	212	106	-1.10404	miss	good
-2.4	11	M	174	87	-1.09109	miss	good
-2.4	30	F	92	46	-1.08164	miss	good
-2.4	50	F	82	41	-1.11318	miss	good
-2.4	13	M	246	123	-0.901346	miss	good
-2.4	52	F	80	40	-1.14159	miss	good
-2.4	47	F	80	40	-1.17376	miss	good
-2.4	14	M	290	145	-0.690181	miss	good
-2.4	20	M	164	82	-0.970928	miss	good
-2.4	27	F	98	49	-1.14639	miss	good
-2.4	20	F	164	82	-0.970928	miss	good
-2.4	13	M	248	124	-0.879466	miss	good
-2.4	10	F	166	83	-1.25693	miss	good
-2.4	9	F	124	62	-1.41521	miss	good
-2.4	69	M	58	29	-1.23418	miss	good
-2.4	10	M	134	67	-1.26727	miss	good
-2.4	33	F	86	43	-1.10347	miss	good
-2.3	14	F	360	180	-0.458494	miss	good
-2.3	65	F	68	34	-1.09557	miss	good
-2.3	15	M	342	171	-0.34702	miss	good
-2.3	15	M	336	168	-0.406537	miss	good
-2.3	14	M	302	151	-0.566983	miss	good
-2.3	24	F	122	61	-0.995094	miss	good
-2.3	60	F	76	38	-1.06372	miss	good
-2.3	37	F	88	44	-0.995071	miss	good
-2.3	4	F	54	27	-1.4026	miss	good
-2.3	16	M	358	179	-0.272449	miss	good
-2.3	54	F	84	42	-1.01845	miss	good
-2.3	10	M	144	72	-1.12408	miss	good
-2.3	52	F	82	41	-1.09402	miss	good
-2.3	48	M	88	44	-0.986329	miss	good
-2.3	33	F	92	46	-0.971078	miss	good
-2.3	57	M	80	40	-1.05014	miss	good
-2.3	25	F	120	60	-0.91705	miss	good
-2.3	58	F	80	40	-1.02428	miss	good
-2.3	34	F	90	45	-0.991152	miss	good
-2.3	14	M	310	155	-0.485937	miss	good
-2.3	11	M	180	90	-1.01497	miss	good
-2.3	19	M	194	97	-0.792076	miss	good
-2.3	9	F	134	67	-1.27857	miss	good
-2.3	24	M	122	61	-0.995094	miss	good
-2.3	12	F	276	138	-0.785667	miss	good
-2.3	53	F	86	43	-0.988401	miss	good
-2.3	43	F	84	42	-1.07794	miss	good
-2.3	40	F	86	43	-1.02946	miss	good
-2.3	57	F	78	39	-1.09867	miss	good
-2.3	41	F	88	44	-0.984685	miss	good
-2.3	9	M	108	54	-1.29476	miss	good
-2.3	12	M	216	108	-0.928635	miss	good
-2.3	35	F	88	44	-1.01744	miss	good
-2.3	63	F	70	35	-1.11641	miss	good
-2.3	71	M	58	29	-1.16397	miss	good
-2.2	13	M	274	137	-0.601166	miss	good
-2.2	13	M	276	138	-0.580206	miss	good
-2.2	52	F	88	44	-0.956667	miss	good
-2.2	13	M	284	142	-0.496967	miss	good
-2.2	18	F	224	112	-0.67891	miss	good
-2.2	11	M	190	95	-0.890316	miss	good
-2.2	54	F	88	44	-0.927753	miss	good
-2.2	12	M	238	119	-0.679137	miss	good
-2.2	54	F	90	45	-0.883635	miss	good
-2.2	8	F	104	52	-1.33151	miss	good
-2.2	59	M	84	42	-0.901843	miss	good
-2.2	58	F	82	41	-0.976708	miss	good
-2.2	12	M	238	119	-0.679137	miss	good
-2.2	53	F	88	44	-0.943473	miss	good
-2.2	69	M	66	33	-0.998296	miss	good
-2.2	45	M	90	45	-0.945574	miss	good
-2.2	14	M	322	161	-0.365919	miss	good
-2.2	46	M	92	46	-0.902393	miss	good
-2.2	14	M	318	159	-0.405723	miss	good
-2.2	13	M	282	141	-0.517688	miss	good
-2.2	78	F	58	29	-1.03362	miss	good
-2.2	36	M	94	47	-0.874223	miss	good
-2.2	36	F	90	45	-0.960158	miss	good
-2.2	11	M	192	96	-0.865703	miss	good
-2.2	55	M	86	43	-0.954394	miss	good
-2.2	12	F	286	143	-0.689872	miss	good
-2.1	11	M	206	103	-0.696197	miss	good
-2.1	20	F	188	94	-0.66376	miss	good
-2.1	58	M	88	44	-0.839356	miss	good
-2.1	20	M	194	97	-0.591908	miss	good
-2.1	9	F	162	81	-0.916188	miss	good
-2.1	73	F	66	33	-0.867957	miss	good
-2.1	37	F	96	48	-0.823143	miss	good
-2.1	66	M	76	38	-0.847884	miss	good
-2.1	31	M	104	52	-0.791848	miss	good
-2.1	47	F	94	47	-0.858781	miss	good
-2.1	38	M	98	49	-0.776025	miss	good
-2.1	46	M	94	47	-0.8598	miss	good
-2.1	44	M	94	47	-0.858642	miss	good
-2.1	59	M	86	43	-0.856071	miss	good
-2.1	49	F	94	47	-0.852018	miss	good
-2.1	45	F	98	49	-0.776581	miss	good
-2.1	70	F	70	35	-0.852782	miss	good
-2.1	37	F	94	47	-0.865018	miss	good
-2.1	9	M	126	63	-1.00831	miss	good
-2.1	57	M	92	46	-0.777755	miss	good
-2.1	46	F	94	47	-0.8598	miss	good
-2.1	70	F	68	34	-0.906865	miss	good
-2.1	12	M	256	128	-0.4818	miss	good
-2.1	27	F	120	60	-0.732739	miss	good
-2.1	50	F	96	48	-0.803902	miss	good
-2.1	9	M	130	65	-0.946937	miss	good
-2.1	10	M	166	83	-0.822411	miss	good
-2.1	63	F	82	41	-0.815619	miss	good
-2.1	16	M	382	191	-0.0351448	miss	good
-2.1	46	M	96	48	-0.817925	miss	good
-2.1	9	F	160	80	-0.941195	miss	good
-2.1	25	M	134	67	-0.684513	miss	good
-2	59	M	90	45	-0.767025	good	good
-2	0	F	40	20	-1.1533	good	good
-2	14	M	342	171	-0.169793	good	good
-2	11	M	214	107	-0.601407	good	good
-2	13	M	310	155	-0.232699	good	good
-2	11	M	214	107	-0.601407	good	good
-2	57	M	96	48	-0.693286	good	good
-2	14	M	352	176	-0.0734548	good	good
-2	13	M	314	157	-0.192843	good	good
-2	16	M	412	206	0.253255	good	good
-2	45	F	100	50	-0.736066	good	good
-2	20	F	202	101	-0.498821	good	good
-2	26	F	132	66	-0.617918	good	good
-2	15	M	390	195	0.11493	good	good
-2	15	M	384	192	0.0584826	good	good
-2	40	F	72	36	-1.36982	good	good
-2	20	F	206	103	-0.453379	good	good
-2	44	F	102	51	-0.695196	good	good
-2	58	M	92	46	-0.751897	good	good
-2	50	F	100	50	-0.722204	good	good
-2	22	F	168	84	-0.575785	good	good
-2	25	F	140	70	-0.590775	good	good
-2	14	M	354	177	-0.0543192	good	good
-2	15	F	432	216	0.118367	good	good
-2	19	F	224	112	-0.457394	good	good
-2	20	M	200	100	-0.521812	good	good
-2	38	M	102	51	-0.695637	good	good
-2	52	F	98	49	-0.743556	good	good
-2	6	M	68	34	-1.02788	good	good
-2	10	F	218	109	-0.665434	good	good
-2	19	F	220	110	-0.499863	good	good
-2	65	M	82	41	-0.740686	good	good
-2	45	F	104	52	-0.656942	good	good
-1.9	8	F	144	72	-0.753269	good	good
-1.9	66	M	86	43	-0.609817	good	good
-1.9	52	M	108	54	-0.54719	good	good
-1.9	44	F	108	54	-0.579218	good	good
-1.9	45	F	110	55	-0.542702	good	good
-1.9	47	F	106	53	-0.617431	good	good
-1.9	57	F	100	50	-0.611588	good	good
-1.9	9	M	152	76	-0.622006	good	good
-1.9	51	F	106	53	-0.596011	good	good
-1.9	7	M	86	43	-0.959773	good	good
-1.9	9	M	146	73	-0.708643	good	good
-1.9	78	M	70	35	-0.688285	good	good
-1.9	54	F	104	52	-0.595003	good	good
-1.9	14	F	432	216	0.159165	good	good
-1.9	68	M	82	41	-0.625452	good	good
-1.9	13	F	394	197	0.00840389	good	good
-1.9	15	M	398	199	0.189655	good	good
-1.9	0	M	36	18	-0.954372	good	good
-1.9	53	F	106	53	-0.57207	good	good
-1.9	37	F	110	55	-0.548081	good	good
-1.9	7	M	86	43	-0.959773	good	good
-1.9	53	F	104	52	-0.610722	good	good
-1.9	13	M	322	161	-0.113735	good	good
-1.9	28	M	124	62	-0.590256	good	good
-1.9	47	F	106	53	-0.617431	good	good
-1.9	65	M	88	44	-0.603334	good	good
-1.9	9	F	184	92	-0.648815	good	good
-1.9	32	F	116	58	-0.531688	good	good
-1.9	60	F	98	49	-0.567613	good	good
-1.9	37	F	110	55	-0.548081	good	good
-1.9	33	F	114	57	-0.538129	good	good
-1.9	33	M	114	57	-0.538129	good	good
-1.8	26	F	150	75	-0.342867	good	good
-1.8	15	M	414	207	0.337326	good	good
-1.8	19	M	242	121	-0.273472	good	good
-1.8	56	F	108	54	-0.479132	good	good
-1.8	44	F	112	56	-0.504733	good	good
-1.8	43	M	112	56	-0.503281	good	good
-1.8	9	M	156	78	-0.565007	good	good
-1.8	50	F	112	56	-0.491869	good	good
-1.8	6	M	78	39	-0.793369	good	good
-1.8	69	M	82	41	-0.588046	good	good
-1.8	13	M	342	171	0.0806697	good	good
-1.8	59	M	104	52	-0.478393	good	good
-1.8	58	F	106	53	-0.467953	good	good
-1.8	5	M	68	34	-0.751032	good	good
-1.8	33	M	120	60	-0.431773	good	good
-1.8	21	F	202	101	-0.318676	good	good
-1.8	36	F	118	59	-0.412481	good	good
-1.8	83	F	76	38	-0.659154	good	good
-1.8	32	M	124	62	-0.392708	good	good
-1.8	46	F	114	57	-0.469444	good	good
-1.8	44	F	116	58	-0.432347	good	good
-1.8	51	M	116	58	-0.411065	good	good
-1.8	7	M	100	50	-0.685753	good	good
-1.8	52	F	110	55	-0.509677	good	good
-1.8	16	F	452	226	0.414993	good	good
-1.8	49	F	116	58	-0.425723	good	good
-1.8	7	M	100	50	-0.685753	good	good
-1.8	19	F	244	122	-0.253719	good	good
-1.8	52	M	112	56	-0.472705	good	good
-1.8	57	M	106	53	-0.493811	good	good
-1.8	71	M	80	40	-0.565408	good	good
-1.8	54	M	112	56	-0.443791	good	good
-1.8	31	F	120	60	-0.497834	good	good
-1.8	33	M	120	60	-0.431773	good	good
-1.8	27	F	138	69	-0.437347	good	good
-1.8	56	M	110	55	-0.441618	good	good
-1.8	16	M	444	222	0.551768	good	good
-1.8	28	M	132	66	-0.458274	good	good
-1.8	35	F	114	57	-0.497027	good	good
-1.8	14	M	382	191	0.209193	good	good
-1.8	51	F	110	55	-0.520424	good	good
-1.8	15	M	418	209	0.373885	good	good
-1.8	47	M	116	58	-0.432485	good	good
-1.7	10	M	210	105	-0.26344	good	good
-1.7	36	M	120	60	-0.377512	good	good
-1.7	39	F	122	61	-0.324554	good	good
-1.7	60	F	108	54	-0.371247	good	good
-1.7	20	F	234	117	-0.153647	good	good
-1.7	43	F	120	60	-0.360478	good	good
-1.7	62	F	104	52	-0.381293	good	good
-1.7	55	F	116	58	-0.353118	good	good
-1.7	9	F	210	105	-0.34882	good	good
-1.7	15	M	436	218	0.536698	good	good
-1.7	35	M	120	60	-0.390671	good	good
-1.7	23	F	182	91	-0.251994	good	good
-1.7	27	F	148	74	-0.286357	good	good
-1.7	7	M	108	54	-0.536076	good	good
-1.7	56	M	116	58	-0.33226	good	good
-1.7	37	M	120	60	-0.368306	good	good
-1.7	52	M	120	60	-0.329902	good	good
-1.7	35	F	122	61	-0.356165	good	good
-1.7	14	M	396	198	0.338043	good	good
-1.7	78	F	78	39	-0.483594	good	good
-1.7	14	M	392	196	0.301417	good	good
-1.7	47	F	122	61	-0.327563	good	good
-1.7	84	M	80	40	-0.620184	good	good
-1.7	31	M	132	66	-0.297289	good	good
-1.7	51	F	122	61	-0.306143	good	good
-1.7	42	M	118	59	-0.393958	good	good
-1.7	37	M	120	60	-0.368306	good	good
-1.7	46	F	124	62	-0.294525	good	good
-1.7	58	M	114	57	-0.318947	good	good
-1.7	52	F	120	60	-0.329902	good	good
-1.7	47	F	124	62	-0.293506	good	good
-1.7	63	F	100	50	-0.424641	good	good
-1.7	35	F	126	63	-0.288488	good	good
-1.7	7	F	126	63	-0.628266	good	good
-1.7	50	M	122	61	-0.314559	good	good
-1.7	8	F	168	84	-0.437363	good	good
-1.7	49	F	122	61	-0.3208	good	good
-1.7	61	M	106	53	-0.37688	good	good
-1.7	28	M	140	70	-0.332544	good	good
-1.7	5	F	92	46	-0.608649	good	good
-1.7	46	F	118	59	-0.398058	good	good
-1.7	14	M	400	200	0.374521	good	good
-1.7	72	M	86	43	-0.393773	good	good
-1.7	58	F	114	57	-0.318947	good	good
-1.7	86	M	82	41	-0.733221	good	good
-1.7	65	F	96	48	-0.431406	good	good
-1.7	9	M	174	87	-0.315428	good	good
-1.7	37	F	124	62	-0.299743	good	good
-1.7	43	M	118	59	-0.395447	good	good
-1.7	11	F	326	163	0.0157506	good	good
-1.6	47	M	126	63	-0.259886	good	good
-1.6	11	F	336	168	0.105775	good	good
-1.6	20	F	246	123	-0.0339268	good	good
-1.6	31	M	138	69	-0.202441	good	good
-1.6	81	M	84	42	-0.385602	good	good
-1.6	6	M	92	46	-0.48439	good	good
-1.6	21	F	226	113	-0.0560736	good	good
-1.6	60	M	116	58	-0.224375	good	good
-1.6	57	M	116	58	-0.308866	good	good
-1.6	33	F	134	67	-0.199236	good	good
-1.6	73	F	88	44	-0.320354	good	good
-1.6	44	M	128	64	-0.226551	good	good
-1.6	42	F	130	65	-0.190826	good	good
-1.6	79	F	84	42	-0.346768	good	good
-1.6	59	M	114	57	-0.290734	good	good
-1.6	34	F	130	65	-0.240343	good	good
-1.6	92	F	84	42	-1.59373	good	good
-1.6	61	F	112	56	-0.264321	good	good
-1.6	14	F	488	244	0.611431	good	good
-1.6	36	F	128	64	-0.242133	good	good
-1.6	5	M	80	40	-0.439381	good	good
-1.6	71	M	90	45	-0.336365	good	good
-1.6	69	F	94	47	-0.32064	good	good
-1.6	14	F	478	239	0.532257	good	good
-1.6	7	F	140	70	-0.421408	good	good
-1.6	16	M	474	237	0.823895	good	good
-1.6	6	M	92	46	-0.48439	good	good
-1.6	34	F	130	65	-0.240343	good	good
-1.6	74	M	84	42	-0.38639	good	good
-1.6	13	M	374	187	0.382507	good	good
-1.6	62	F	108	54	-0.304567	good	good
-1.6	53	M	124	62	-0.248145	good	good
-1.6	34	F	132	66	-0.207961	good	good
-1.6	70	F	90	45	-0.370515	good	good
-1.6	14	M	412	206	0.483089	good	good
-1.6	49	F	126	63	-0.253124	good	good
-1.6	34	M	130	65	-0.240343	good	good
-1.6	19	M	266	133	-0.0445607	good	good
-1.6	61	M	112	56	-0.264321	good	good
-1.6	5	M	78	39	-0.489952	good	good
-1.6	47	F	128	64	-0.22669	good	good
-1.6	14	M	416	208	0.518997	good	good
-1.6	40	F	130	65	-0.189604	good	good
-1.6	30	F	142	71	-0.185526	good	good
-1.6	50	F	124	62	-0.280503	good	good
-1.6	10	M	220	110	-0.143189	good	good
-1.6	22	F	204	102	-0.134457	good	good
-1.6	57	M	118	59	-0.273419	good	good
-1.5	19	F	282	141	0.0990207	good	good
-1.5	75	M	90	45	-0.231446	good	good
-1.5	64	F	112	56	-0.15729	good	good
-1.5	33	M	138	69	-0.136381	good	good
-1.5	62	F	114	57	-0.193634	good	good
-1.5	6	M	98	49	-0.357801	good	good
-1.5	75	F	90	45	-0.231446	good	good
-1.5	68	M	100	50	-0.234473	good	good
-1.5	69	F	98	49	-0.237583	good	good
-1.5	53	F	134	67	-0.0841711	good	good
-1.5	10	M	242	121	0.113916	good	good
-1.5	51	F	136	68	-0.0764994	good	good
-1.5	70	M	100	50	-0.161007	good	good
-1.5	44	M	136	68	-0.0977806	good	good
-1.5	62	M	116	58	-0.157695	good	good
-1.5	37	M	134	67	-0.135769	good	good
-1.5	42	M	132	66	-0.158444	good	good
-1.5	44	M	138	69	-0.0665378	good	good
-1.5	13	F	462	231	0.563358	good	good
-1.5	51	F	136	68	-0.0764994	good	good
-1.5	63	F	116	58	-0.121918	good	good
-1.5	16	M	480	240	0.877484	good	good
-1.5	53	F	130	65	-0.148546	good	good
-1.5	8	M	154	77	-0.181096	good	good
-1.5	37	F	134	67	-0.135769	good	good
-1.5	42	F	132	66	-0.158444	good	good
-1.5	65	F	106	53	-0.231931	good	good
-1.5	77	M	88	44	-0.25198	good	good
-1.5	3	F	112	56	-0.00802512	good	good
-1.5	42	F	132	66	-0.158444	good	good
-1.5	15	M	470	235	0.837076	good	good
-1.5	12	F	418	209	0.469476	good	good
-1.5	11	F	346	173	0.194734	good	good
-1.5	24	F	192	96	-0.00253193	good	good
-1.5	12	M	338	169	0.354669	good	good
-1.5	41	F	134	67	-0.125383	good	good
-1.5	3	M	84	42	0.125505	good	good
-1.5	46	M	134	67	-0.130551	good	good
-1.5	69	F	100	50	-0.197067	good	good
-1.5	22	F	220	110	0.0418585	good	good
-1.5	8	F	184	92	-0.236752	good	good
-1.5	12	M	334	167	0.3159	good	good
-1.5	11	F	346	173	0.194734	good	good
-1.5	14	M	432	216	0.661266	good	good
-1.5	65	M	106	53	-0.231931	good	good
-1.5	37	M	138	69	-0.0729139	good	good
-1.5	61	F	116	58	-0.191934	good	good
-1.5	28	F	154	77	-0.12572	good	good
-1.5	33	F	142	71	-0.0749666	good	good
-1.5	48	F	136	68	-0.095415	good	good
-1.5	27	F	168	84	-0.00735166	good	good
-1.4	36	F	142	71	-0.0207054	good	good
-1.4	51	F	144	72	0.046347	good	good
-1.4	48	M	144	72	0.0274315	good	good
-1.4	42	F	140	70	-0.032714	good	good
-1.4	19	M	290	145	0.16838	good	good
-1.4	50	M	138	69	-0.0536734	good	good
-1.4	66	M	110	55	-0.117899	good	good
-1.4	28	F	168	84	0.0665685	good	good
-1.4	18	F	334	167	0.3031	good	good
-1.4	47	M	144	72	0.024927	good	good
-1.4	26	F	184	92	0.111577	good	good
-1.4	13	M	402	201	0.638232	good	good
-1.4	15	F	532	266	0.936034	good	good
-1.4	53	F	142	71	0.0400983	good	good
-1.4	31	F	150	75	-0.0222382	good	good
-1.4	66	M	114	57	-0.0444796	good	good
-1.4	53	M	140	70	0.0095667	good	good
-1.4	61	M	128	64	0.0138611	good	good
-1.4	55	M	136	68	-0.0185517	good	good
-1.4	12	F	426	213	0.534606	good	good
-1.4	40	F	138	69	-0.0623746	good	good
-1.4	63	M	120	60	-0.051502	good	good
-1.4	37	F	146	73	0.0485457	good	good
-1.4	45	M	140	70	-0.0366524	good	good
-1.4	50	F	144	72	0.0379303	good	good
-1.4	54	M	136	68	-0.0368388	good	good
-1.4	68	F	108	54	-0.0786231	good	good
-1.4	53	F	142	71	0.0400983	good	good
-1.4	76	M	96	48	-0.0888036	good	good
-1.4	65	M	112	56	-0.119372	good	good
-1.4	10	M	254	127	0.250207	good	good
-1.4	61	F	128	64	0.0138611	good	good
-1.4	8	F	202	101	-0.0192351	good	good
-1.4	56	F	138	69	0.0335487	good	good
-1.4	58	M	132	66	-0.0120464	good	good
-1.4	16	M	514	257	1.17624	good	good
-1.4	6	M	108	54	-0.153508	good	good
-1.4	57	F	136	68	0.0257	good	good
-1.4	50	M	142	71	0.00774079	good	good
-1.4	46	F	142	71	-0.00628154	good	good
-1.4	33	F	144	72	-0.0447771	good	good
-1.4	52	M	138	69	-0.0345098	good	good
-1.4	37	M	144	72	0.0186898	good	good
-1.4	66	F	110	55	-0.117899	good	good
-1.4	55	F	138	69	0.012691	good	good
-1.4	64	F	118	59	-0.0494562	good	good
-1.4	39	M	144	72	0.0279356	good	good
-1.4	71	M	100	50	-0.126858	good	good
-1.3	45	M	146	73	0.0539247	good	good
-1.3	45	M	150	75	0.112668	good	good
-1.3	47	M	152	76	0.142429	good	good
-1.3	11	F	392	196	0.591365	good	good
-1.3	54	F	142	71	0.0558182	good	good
-1.3	5	F	124	62	-0.00714472	good	good
-1.3	53	F	146	73	0.100144	good	good
-1.3	13	M	430	215	0.886924	good	good
-1.3	7	M	136	68	-0.0440731	good	good
-1.3	60	M	134	67	0.0785782	good	good
-1.3	46	F	152	76	0.14141	good	good
-1.3	12	F	444	222	0.679386	good	good
-1.3	80	M	100	50	-0.0170495	good	good
-1.3	63	M	124	62	0.0170611	good	good
-1.3	71	M	108	54	0.0289927	good	good
-1.3	12	F	456	228	0.774603	good	good
-1.3	45	F	152	76	0.141571	good	good
-1.3	24	F	210	105	0.204489	good	good
-1.3	30	F	168	84	0.183055	good	good
-1.3	7	F	166	83	-0.0580251	good	good
-1.3	44	M	150	75	0.113665	good	good
-1.3	19	F	308	154	0.319013	good	good
-1.3	52	M	146	73	0.0869499	good	good
-1.3	51	F	146	73	0.076203	good	good
-1.3	30	M	168	84	0.183055	good	good
-1.3	54	F	146	73	0.115864	good	good
-1.3	41	M	148	74	0.088462	good	good
-1.3	72	F	104	52	-0.0160939	good	good
-1.3	44	F	148	74	0.0844523	good	good
-1.3	23	F	222	111	0.207093	good	good
-1.3	9	F	264	132	0.230306	good	good
-1.3	67	F	114	57	-0.00591816	good	good
-1.3	57	M	138	69	0.0569428	good	good
-1.3	37	F	148	74	0.0780762	good	good
-1.3	18	M	348	174	0.408553	good	good
-1.3	57	M	144	72	0.148546	good	good
-1.3	55	M	146	73	0.134151	good	good
-1.3	10	M	268	134	0.405998	good	good
-1.3	11	M	312	156	0.463266	good	good
-1.3	46	F	150	75	0.112507	good	good
-1.3	18	M	340	170	0.348719	good	good
-1.3	12	M	366	183	0.621088	good	good
-1.3	41	F	150	75	0.117675	good	good
-1.3	45	F	152	76	0.141571	good	good
-1.3	55	M	146	73	0.134151	good	good
-1.3	12	F	458	229	0.790375	good	good
-1.3	44	F	148	74	0.0844523	good	good
-1.3	61	F	132	66	0.0790269	good	good
-1.3	66	F	120	60	0.0618762	good	good
-1.3	14	M	474	237	1.02503	good	good
-1.3	43	M	152	76	0.144021	good	good
-1.3	30	F	166	83	0.156389	good	good
-1.3	54	M	148	74	0.145394	good	good
-1.2	10	M	284	142	0.580112	good	good
-1.2	46	M	162	81	0.281523	good	good
-1.2	54	M	152	76	0.20351	good	good
-1.2	52	F	158	79	0.259517	good	good
-1.2	9	M	230	115	0.401772	good	good
-1.2	49	F	160	80	0.261846	good	good
-1.2	56	M	150	75	0.213752	good	good
-1.2	54	F	154	77	0.23211	good	good
-1.2	46	M	156	78	0.198315	good	good
-1.2	19	F	326	163	0.462761	good	good
-1.2	48	F	160	80	0.257588	good	good
-1.2	8	F	226	113	0.259075	good	good
-1.2	24	F	218	109	0.291965	good	good
-1.2	66	F	128	64	0.197255	good	good
-1.2	46	M	154	77	0.170011	good	good
-1.2	57	F	150	75	0.237146	good	good
-1.2	49	F	160	80	0.261846	good	good
-1.2	55	F	150	75	0.192894	good	good
-1.2	49	F	160	80	0.261846	good	good
-1.2	65	F	126	63	0.125614	good	good
-1.2	68	F	120	60	0.138665	good	good
-1.2	46	F	154	77	0.170011	good	good
-1.2	53	F	154	77	0.216391	good	good
-1.2	3	F	134	67	0.49873	good	good
-1.2	46	F	154	77	0.170011	good	good
-1.2	40	F	156	78	0.203637	good	good
-1.2	71	M	112	56	0.103478	good	good
-1.2	23	M	234	117	0.33183	good	good
-1.2	11	M	332	166	0.66301	good	good
-1.2	43	M	160	80	0.256675	good	good
-1.2	68	F	122	61	0.173172	good	good
-1.2	45	F	160	80	0.254226	good	good
-1.2	13	F	514	257	0.965909	good	good
-1.2	37	F	156	78	0.193097	good	good
-1.2	39	F	158	79	0.230359	good	good
-1.2	25	F	208	104	0.294755	good	good
-1.2	65	M	128	64	0.15881	good	good
-1.2	45	F	104	52	-0.656942	good	good
-1.2	45	M	156	78	0.198476	good	good
-1.2	66	M	128	64	0.197255	good	good
-1.2	37	M	160	80	0.248847	good	good
-1.2	45	F	154	77	0.170171	good	good
-1.2	35	F	158	79	0.198748	good	good
-1.2	44	F	154	77	0.171169	good	good
-1.2	12	M	392	196	0.861262	good	good
-1.2	53	M	158	79	0.272711	good	good
-1.2	55	M	150	75	0.192894	good	good
-1.2	14	M	480	240	1.07593	good	good
-1.2	6	F	152	76	0.128017	good	good
-1.2	46	F	156	78	0.198315	good	good
-1.2	25	M	214	107	0.361104	good	good
-1.2	14	M	492	246	1.17696	good	good
-1.2	25	F	210	105	0.317039	good	good
-1.2	29	F	174	87	0.20821	good	good
-1.2	44	F	154	77	0.171169	good	good
-1.2	13	F	528	264	1.07146	good	good
-1.2	69	M	118	59	0.141102	good	good
-1.2	35	F	164	82	0.281127	good	good
-1.2	8	F	224	112	0.236349	good	good
-1.2	61	M	138	69	0.173874	good	good
-1.2	44	M	156	78	0.199473	good	good
-1.1	34	F	166	83	0.290217	good	good
-1.1	25	F	224	112	0.468451	good	good
-1.1	25	F	222	111	0.447293	good	good
-1.1	5	F	136	68	0.201906	good	good
-1.1	43	M	168	84	0.36491	good	good
-1.1	45	F	170	85	0.388873	good	good
-1.1	16	M	552	276	1.50094	good	good
-1.1	50	F	166	83	0.349657	good	good
-1.1	44	M	166	83	0.336792	good	good
-1.1	42	M	166	83	0.339733	good	good
-1.1	61	M	146	73	0.295334	good	good
-1.1	42	M	170	85	0.392812	good	good
-1.1	31	F	182	91	0.407422	good	good
-1.1	8	M	190	95	0.335288	good	good
-1.1	41	F	166	83	0.340802	good	good
-1.1	25	F	218	109	0.404515	good	good
-1.1	29	F	190	95	0.40744	good	good
-1.1	54	F	164	82	0.37081	good	good
-1.1	46	F	170	85	0.388713	good	good
-1.1	1	M	54	27	-0.0147747	good	good
-1.1	14	M	506	253	1.29359	good	good
-1.1	60	F	148	74	0.292424	good	good
-1.1	13	F	550	275	1.2351	good	good
-1.1	18	M	378	189	0.623566	good	good
-1.1	47	M	164	82	0.309729	good	good
-1.1	65	M	136	68	0.28758	good	good
-1.1	47	F	166	83	0.336653	good	good
-1.1	37	M	170	85	0.383494	good	good
-1.1	46	F	168	84	0.3623	good	good
-1.1	6	F	158	79	0.217264	good	good
-1.1	34	M	172	86	0.369461	good	good
-1.1	61	F	146	73	0.295334	good	good
-1.1	9	F	290	145	0.492016	good	good
-1.1	60	F	150	75	0.321637	good	good
-1.1	59	F	158	79	0.405041	good	good
-1.1	75	M	112	56	0.208397	good	good
-1.1	37	M	170	85	0.383494	good	good
-1	11	M	364	182	0.97286	good	good
-1	7	F	204	102	0.434375	good	good
-1	69	M	132	66	0.376616	good	good
-1	7	F	198	99	0.359237	good	good
-1	10	F	382	191	0.903603	good	good
-1	39	M	154	77	0.174038	good	good
-1	59	F	162	81	0.460232	good	good
-1	21	F	296	148	0.599715	good	good
-1	18	M	384	192	0.664919	good	good
-1	41	F	172	86	0.420045	good	good
-1	35	F	180	90	0.489582	good	good
-1	49	M	172	86	0.422659	good	good
-1	48	M	174	87	0.444325	good	good
-1	46	F	112	56	-0.505891	good	good
-1	41	F	178	89	0.497108	good	good
-1	56	M	168	84	0.463544	good	good
-1	13	M	474	237	1.26501	good	good
-1	55	F	166	83	0.416021	good	good
-1	11	M	358	179	0.91562	good	good
-1	25	F	230	115	0.531031	good	good
-1	68	F	132	66	0.33921	good	good
-1	49	F	170	85	0.396494	good	good
-1	37	M	174	87	0.435583	good	good
-1	58	F	162	81	0.432019	good	good
-1	66	M	142	71	0.418683	good	good
-1	46	M	172	86	0.414878	good	good
-1	66	M	130	65	0.230039	good	good
-1	8	M	210	105	0.605158	good	good
-1	37	M	174	87	0.435583	good	good
-1	55	F	166	83	0.416021	good	good
-1	44	F	174	87	0.441959	good	good
-1	78	F	118	59	0.341659	good	good
-1	32	F	180	90	0.418983	good	good
-1	53	F	168	84	0.40868	good	good
-1	49	M	174	87	0.448582	good	good
-1	35	F	182	91	0.514585	good	good
-1	42	F	178	89	0.496039	good	good
-1	42	F	172	86	0.418977	good	good
-1	52	M	174	87	0.473987	good	good
-1	57	F	166	83	0.460273	good	good
-1	32	F	182	91	0.443985	good	good
-1	56	F	162	81	0.382767	good	good
-1	68	F	134	67	0.371202	good	good
-1	8	F	254	127	0.569222	good	good
-1	4	M	108	54	0.580503	good	good
-1	85	F	120	60	0.118645	good	good
-1	53	M	170	85	0.435092	good	good
-1	54	F	166	83	0.397734	good	good
-1	52	M	170	85	0.421899	good	good
-1	10	M	306	153	0.813238	good	good
-1	37	F	180	90	0.511947	good	good
-1	71	F	130	65	0.414443	good	good
-1	31	F	184	92	0.432206	good	good
-1	40	M	174	87	0.446122	good	good
-1	18	M	384	192	0.664919	good	good
-1	56	F	168	84	0.463544	good	good
-1	52	F	172	86	0.448064	good	good
-0.9	54	F	180	90	0.579265	good	good
-0.9	52	F	184	92	0.600137	good	good
-0.9	40	F	180	90	0.522487	good	good
-0.9	7	F	220	110	0.630538	good	good
-0.9	25	M	242	121	0.652373	good	good
-0.9	53	M	182	91	0.588548	good	good
-0.9	38	M	186	93	0.592238	good	good
-0.9	30	F	198	99	0.555406	good	good
-0.9	55	F	174	87	0.521188	good	good
-0.9	60	M	162	81	0.490652	good	good
-0.9	40	F	184	92	0.572273	good	good
-0.9	7	M	182	91	0.683491	good	good
-0.9	46	M	186	93	0.59152	good	good
-0.9	2	M	60	30	0.248558	good	good
-0.9	71	F	132	66	0.446826	good	good
-0.9	60	F	162	81	0.490652	good	good
-0.9	35	F	188	94	0.588296	good	good
-0.9	36	F	184	92	0.552528	good	good
-0.9	12	M	440	220	1.28853	good	good
-0.9	37	F	188	94	0.610661	good	good
-0.9	46	F	186	93	0.59152	good	good
-0.9	20	M	338	169	0.75527	good	good
-0.9	30	F	204	102	0.624383	good	good
-0.9	55	M	180	90	0.597552	good	good
-0.9	57	F	176	88	0.591125	good	good
-0.9	61	M	162	81	0.523093	good	good
-0.9	46	F	188	94	0.615879	good	good
-0.9	13	M	490	245	1.39898	good	good
-0.9	10	F	386	193	0.938026	good	good
-0.9	4	F	144	72	0.593847	good	good
-0.9	46	F	188	94	0.615879	good	good
-0.9	38	F	180	90	0.517883	good	good
-0.9	16	M	590	295	1.81681	good	good
-0.9	54	M	176	88	0.528586	good	good
-0.9	2	M	58	29	0.185605	good	good
-0.9	16	M	602	301	1.91485	good	good
-0.9	5	M	122	61	0.527144	good	good
-0.9	16	M	604	302	1.93111	good	good
-0.9	12	F	520	260	1.26642	good	good
-0.9	45	M	184	92	0.567112	good	good
-0.8	29	F	218	109	0.725886	good	good
-0.8	5	M	132	66	0.736292	good	good
-0.8	38	F	196	98	0.712004	good	good
-0.8	14	M	556	278	1.69998	good	good
-0.8	31	F	204	102	0.668883	good	good
-0.8	8	F	276	138	0.803402	good	good
-0.8	33	F	200	100	0.689142	good	good
-0.8	33	F	198	99	0.665966	good	good
-0.8	51	M	190	95	0.66247	good	good
-0.8	34	M	198	99	0.689233	good	good
-0.8	63	M	164	82	0.620296	good	good
-0.8	55	F	186	93	0.671907	good	good
-0.8	20	F	352	176	0.859743	good	good
-0.8	53	F	190	95	0.686411	good	good
-0.8	20	F	358	179	0.903502	good	good
-0.8	30	F	212	106	0.713872	good	good
-0.8	40	F	190	95	0.645352	good	good
-0.8	22	M	304	152	0.827882	good	good
-0.8	46	M	190	95	0.640031	good	good
-0.8	32	F	206	103	0.728077	good	good
-0.8	66	M	158	79	0.651296	good	good
-0.8	49	F	194	97	0.695512	good	good
-0.8	18	M	434	217	0.990809	good	good
-0.8	47	F	196	98	0.712306	good	good
-0.8	55	M	184	92	0.647338	good	good
-0.8	11	M	396	198	1.27199	good	good
-0.8	53	M	192	96	0.71036	good	good
-0.7	67	F	158	79	0.689857	good	good
-0.7	48	F	204	102	0.807152	good	good
-0.7	82	F	142	71	0.653848	good	good
-0.7	41	M	208	104	0.853884	good	good
-0.7	44	M	204	102	0.804786	good	good
-0.7	66	M	164	82	0.733675	good	good
-0.7	49	M	200	100	0.765608	good	good
-0.7	15	F	684	342	2.06915	good	miss
-0.7	7	M	194	97	0.860655	good	good
-0.7	44	F	200	100	0.758985	good	good
-0.7	58	F	190	95	0.790528	good	good
-0.7	48	M	208	104	0.85224	good	good
-0.7	26	F	254	127	0.86758	good	good
-0.7	37	F	204	102	0.79841	good	good
-0.7	57	M	190	95	0.764669	good	good
-0.7	16	M	634	317	2.17255	good	miss
-0.7	50	F	200	100	0.771849	good	good
-0.7	69	M	154	77	0.70917	good	good
-0.7	26	F	252	126	0.848454	good	good
-0.7	52	M	204	102	0.836814	good	good
-0.7	56	M	198	99	0.835895	good	good
-0.7	45	F	204	102	0.803789	good	good
-0.7	2	M	68	34	0.488514	good	good
-0.7	47	F	202	101	0.781837	good	good
-0.7	42	F	202	101	0.784917	good	good
-0.7	57	M	192	96	0.788619	good	good
-0.7	56	F	196	98	0.812531	good	good
-0.7	48	M	208	104	0.85224	good	good
-0.7	49	F	198	99	0.742432	good	good
-0.7	50	F	206	103	0.840282	good	good
-0.6	41	M	212	106	0.898285	good	good
-0.6	42	F	210	105	0.875101	good	good
-0.6	78	M	146	73	0.79348	good	good
-0.6	41	F	216	108	0.942019	good	good
-0.6	32	F	224	112	0.92423	good	good
-0.6	22	M	328	164	1.02006	good	good
-0.6	41	M	216	108	0.942019	good	good
-0.6	11	F	520	260	1.60694	good	good
-0.6	66	F	174	87	0.865765	good	good
-0.6	13	M	544	272	1.83873	good	good
-0.6	25	F	284	142	1.04235	good	good
-0.6	77	F	148	74	0.821167	good	good
-0.6	49	F	208	104	0.856498	good	good
-0.6	64	M	178	89	0.840541	good	good
-0.6	13	M	550	275	1.88648	good	good
-0.6	7	M	204	102	1.00497	good	good
-0.6	25	F	276	138	0.971805	good	good
-0.6	57	F	206	103	0.950899	good	good
-0.6	25	M	282	141	1.02487	good	good
-0.6	10	M	364	182	1.3977	good	good
-0.6	36	M	216	108	0.922428	good	good
-0.6	36	F	212	106	0.878693	good	good
-0.6	6	M	172	86	1.00843	good	good
-0.6	43	F	214	107	0.917677	good	good
-0.6	47	F	218	109	0.959496	good	good
-0.6	21	F	356	178	1.06913	good	good
-0.6	28	F	250	125	0.988849	good	good
-0.6	41	F	214	107	0.920234	good	good
-0.6	65	F	174	87	0.82732	good	good
-0.5	25	F	298	149	1.16207	good	good
-0.5	42	M	228	114	1.06838	good	good
-0.5	68	M	174	87	0.942554	good	good
-0.5	22	M	350	175	1.18658	good	good
-0.5	2	F	104	52	0.793052	good	good
-0.5	21	F	366	183	1.14109	good	good
-0.5	54	M	222	111	1.06335	good	good
-0.5	75	F	160	80	0.968353	good	good
-0.5	11	M	444	222	1.70313	good	good
-0.5	37	F	222	111	0.996037	good	good
-0.5	37	M	220	110	0.974725	good	good
-0.5	27	F	268	134	1.08391	good	good
-0.5	36	M	224	112	1.00799	good	good
-0.5	69	M	170	85	0.927872	good	good
-0.5	52	F	216	108	0.970038	good	good
-0.5	63	F	194	97	0.999317	good	good
-0.5	78	M	154	77	0.909727	good	good
-0.5	66	M	178	89	0.916904	good	good
-0.5	7	M	224	112	1.28536	good	good
-0.5	40	F	226	113	1.04874	good	good
-0.5	41	F	226	113	1.04859	good	good
-0.5	4	F	184	92	1.30492	good	good
-0.5	36	F	228	114	1.04986	good	good
-0.5	37	F	224	112	1.01719	good	good
-0.5	12	M	500	250	1.7972	good	good
-0.5	14	F	720	360	2.297	good	miss
-0.5	65	M	190	95	1.02655	good	good
-0.5	53	M	220	110	1.02632	good	good
-0.5	75	F	156	78	0.912603	good	good
-0.5	71	F	162	81	0.890892	good	good
-0.5	37	M	220	110	0.974725	good	good
-0.5	40	F	226	113	1.04874	good	good
-0.5	32	M	234	117	1.02781	good	good
-0.5	32	F	238	119	1.06825	good	good
-0.5	44	M	228	114	1.06544	good	good
-0.5	60	F	202	101	0.989947	good	good
-0.4	43	F	232	116	1.10817	good	good
-0.4	57	M	222	111	1.12589	good	good
-0.4	36	F	232	116	1.09114	good	good
-0.4	50	F	232	116	1.11959	good	good
-0.4	34	F	242	121	1.16092	good	good
-0.4	67	M	190	95	1.10356	good	good
-0.4	64	M	198	99	1.08325	good	good
-0.4	54	F	228	114	1.12638	good	good
-0.4	71	F	174	87	1.05017	good	good
-0.4	65	F	192	96	1.0505	good	good
-0.4	21	M	388	194	1.29403	good	good
-0.4	37	F	242	121	1.20112	good	good
-0.4	40	F	238	119	1.17175	good	good
-0.4	49	M	234	117	1.13377	good	good
-0.4	23	F	342	171	1.27094	good	good
-0.4	26	F	288	144	1.17562	good	good
-0.4	43	F	230	115	1.0876	good	good
-0.4	75	M	162	81	0.995811	good	good
-0.4	66	M	196	98	1.13625	good	good
-0.4	10	F	484	242	1.74131	good	good
-0.4	54	M	224	112	1.08451	good	good
-0.4	39	F	230	115	1.08902	good	good
-0.4	33	F	248	124	1.19652	good	good
-0.4	61	M	206	103	1.06783	good	good
-0.3	61	M	216	108	1.17842	good	good
-0.3	43	F	242	121	1.20895	good	good
-0.3	18	M	530	265	1.5403	good	good
-0.3	31	F	260	130	1.24487	good	good
-0.3	43	M	252	126	1.30644	good	good
-0.3	48	M	244	122	1.22961	good	good
-0.3	33	M	256	128	1.27328	good	good
-0.3	4	M	150	75	1.5852	good	good
-0.3	24	F	342	171	1.39859	good	good
-0.3	47	M	250	125	1.2856	good	good
-0.3	58	F	232	116	1.25606	good	good
-0.3	36	F	246	123	1.23129	good	good
-0.3	12	M	546	273	2.17079	good	miss
-0.3	25	M	318	159	1.32552	good	good
-0.3	27	F	294	147	1.31264	good	good
-0.3	75	F	176	88	1.18077	good	good
-0.3	15	M	684	342	2.55865	good	miss
-0.3	38	M	252	126	1.30455	good	good
-0.3	42	M	252	126	1.30793	good	good
-0.3	61	M	222	111	1.24282	good	good
-0.2	71	M	192	96	1.27335	good	good
-0.2	55	M	254	127	1.40334	good	good
-0.2	60	M	232	116	1.31469	good	good
-0.2	55	M	244	122	1.30647	good	good
-0.2	2	M	96	48	1.21528	good	good
-0.2	58	M	244	122	1.37658	good	good
-0.2	13	M	628	314	2.48949	good	miss
-0.2	27	F	304	152	1.39632	good	good
-0.2	51	F	258	129	1.38329	good	good
-0.2	41	M	262	131	1.40344	good	good
-0.2	36	M	262	131	1.38385	good	good
-0.2	11	M	502	251	2.19993	good	miss
-0.2	53	M	250	125	1.33096	good	good
-0.2	40	M	258	129	1.36617	good	good
-0.2	65	M	214	107	1.30158	good	good
-0.2	58	M	238	119	1.31693	good	good
-0.2	12	M	568	284	2.345	good	miss
-0.1	35	F	272	136	1.4623	good	good
-0.1	75	M	188	94	1.33017	good	good
-0.1	17	M	738	369	3.15979	good	miss
-0.1	54	F	264	132	1.47892	good	good
-0.1	49	F	268	134	1.46135	good	good
-0.1	2	F	126	63	1.20715	good	good
-0.1	74	F	194	97	1.38189	good	good
-0.1	41	M	266	133	1.44041	good	good
-0.1	8	F	398	199	1.98646	good	good
0	40	F	290	145	1.65351	good	good
0	13	M	666	333	2.77234	good	miss
0	58	M	268	134	1.60406	good	good
0	44	M	282	141	1.57999	good	good
0	39	F	290	145	1.65221	good	good
0	52	F	276	138	1.55895	good	good
0	59	F	262	131	1.57698	good	good
0.1	9	M	416	208	2.38835	good	miss
0.1	57	M	276	138	1.65041	good	good
0.1	72	M	222	111	1.64226	good	good
0.1	15	M	784	392	3.28724	good	miss
0.1	47	M	292	146	1.66631	good	good
0.1	66	M	246	123	1.67068	good	good
0.1	33	M	310	155	1.74643	good	good
0.1	46	F	292	146	1.66529	good	good
0.1	14	M	730	365	3.01199	good	miss
0.2	72	M	230	115	1.726	good	good
0.2	27	F	374	187	1.92738	good	good
0.2	2	F	152	76	1.64391	good	good
0.2	30	F	336	168	1.84046	good	good
0.2	79	M	220	110	1.71373	good	good
0.2	73	F	226	113	1.71292	good	good
0.3	7	M	310	155	2.39141	good	miss
0.3	55	F	320	160	1.97576	good	good
0.3	12	M	660	330	3.04598	good	miss
0.3	69	M	250	125	1.82374	good	good
0.3	10	M	514	257	2.75709	good	miss
0.3	46	M	322	161	1.91118	good	good
0.3	80	M	236	118	1.86546	good	good
0.4	28	M	394	197	2.1383	good	miss
0.4	13	M	750	375	3.3756	good	miss
0.4	47	F	338	169	2.03593	good	miss
0.4	0	F	192	96	1.93809	good	good
0.4	42	M	334	167	2.00852	good	miss
0.4	19	F	646	323	2.32814	good	miss
0.5	8	F	502	251	2.88317	good	miss
0.5	14	M	820	410	3.64089	good	miss
0.5	45	M	360	180	2.19776	good	miss
0.5	52	M	350	175	2.15785	good	miss
0.6	5	M	250	125	2.85168	good	miss
0.6	35	F	378	189	2.29731	good	miss
0.6	6	M	292	146	2.79104	good	miss
0.6	78	M	264	132	2.15653	good	miss
0.6	53	F	212	106	0.939497	good	good
0.6	74	F	278	139	2.23772	good	miss
0.6	2	M	142	71	2.17147	good	miss
0.6	18	M	754	377	2.56483	good	miss
0.6	6	F	364	182	2.7435	good	miss
0.6	58	F	354	177	2.30453	good	miss
0.7	47	F	382	191	2.35353	good	miss
0.7	80	F	280	140	2.28042	good	miss
0.7	15	F	1006	503	4.17759	good	miss
0.7	19	M	712	356	2.61481	good	miss
0.7	50	M	200	100	0.771849	good	good
0.8	62	M	356	178	2.44443	good	miss
0.8	16	M	942	471	4.43117	good	miss
0.8	11	M	686	343	3.64149	good	miss
0.9	9	M	542	271	3.53057	good	miss
0.9	5	F	358	179	3.25468	good	miss
0.9	35	F	186	93	0.563937	good	good
0.9	0	M	178	89	2.45632	good	miss
1	8	M	480	240	3.57856	good	miss
1.1	48	M	460	230	2.85338	good	miss
1.2	76	F	352	176	2.8685	good	miss
1.2	53	M	474	237	2.97823	good	miss
1.2	65	F	402	201	2.87379	good	miss
1.3	11	M	792	396	4.40112	good	miss
1.3	78	M	366	183	2.9803	good	miss
1.4	46	F	528	264	3.23102	good	miss
1.4	57	M	494	247	3.17033	good	miss
1.5	6	M	400	200	4.15275	good	miss
1.5	64	F	482	241	3.32644	good	miss
1.5	2	M	220	110	3.43402	good	miss
1.7	62	M	530	265	3.51743	good	miss
1.8	47	M	616	308	3.67085	good	miss
1.9	14	M	1172	586	5.87159	good	miss
1.9	6	M	462	231	4.86742	good	miss
2	54	F	652	326	3.89705	good	good
2.1	79	F	516	258	3.90052	good	good
2.6	56	F	798	399	4.53908	good	good
2.8	35	F	900	450	4.78088	good	good
2.8	6	M	592	296	6.2514	good	good
3.5	38	M	1178	589	5.67161	good	good
